# Supplementary material
Source: publisher figshare collection journal article supplement (https://springernature.figshare.com/ndownloader/files/13011500)
Supplement: Supplementary file 1 [file 13011500]

Appendix Figure 1. Father’s sector of work and employment status when individual was age 15, as reported in 1998 versus 2006, father not in household in 1998 or 2006, age 30-54 in 1998 (percentage)

Source: Authors’ calculations based on ELMPS 1998 and ELMPS 2006
